# Supplementary material for: Overexpression of ERAP2N in Human Trophoblast Cells Promotes Cell Death
Source: MDPI journal article supplement (doi:10.3390/ijms22168585), 2021-08-10
Supplement: s1 [file s1]

| Promoting Cell Survival | Promoting Cell Death |
|-------------------------|----------------------|
| COL9A3 ↓                | GPI ↓                |
| TPI1 ↓                  | PGAM1 ↓              |
| SLC9A3R1 ↓              | HK2 ↓                |
| TLR3 ↓                  | LDHA ↓               |
| TAPBP ↓                 | PKM ↓                |
| CDC42 ↑                 | ALDOC ↓              |
| ENO3 ↑                  | PGM1 ↓               |
| THBS3 ↑                 | PFKP ↓               |
| SEC31B ↑                | EGLN1 ↓              |
|                         | MAML3 ↓              |
|                         | EGLN3 ↓              |
|                         | TFRC ↓               |
|                         | STAT3 ↓              |
|                         | PFKFB4 ↓             |
|                         | AKR1B1 ↓             |
|                         | PDIA3 ↓              |
|                         | HSPA5 ↓              |
|                         | WFS1 ↓               |
|                         | RRBP1 ↓              |
|                         | CKAP4 ↓              |
|                         | DDOST ↓              |
|                         | PDIA4 ↓              |
|                         | HSP90B1 ↓            |
|                         | OS9 ↓                |
|                         | P4HB ↓               |
|                         | HSPA1B ↓             |
|                         | RFX5 ↓               |
|                         | HLA-C ↓              |
|                         | CTSS ↓               |
|                         | CTSB ↓               |
|                         | SLC16A3 ↓            |
|                         | TGFB1 ↓              |
|                         | ITGB5 ↓              |
|                         | FZD7 ↓               |
|                         | WNT7A ↓              |
|                         | ITPR2 ↓              |
|                         | WNT11 ↓              |
|                         | SDC1 ↓               |
|                         | ITGA5 ↓              |
|                         | EZR ↓                |
|                         | ENO1 ↓               |
|                         | ITGB6 ↓              |
|                         | HEY1 ↓               |

|  |            |
|--|------------|
|  | ATP6V0A4 ↓ |
|  | EGLN2 ↑    |
|  | PPP1R12B ↑ |
