# Supplementary material for: Overexpression of ERAP2N in Human Trophoblast Cells Promotes Cell Death
Source: MDPI journal article supplement (doi:10.3390/ijms22168585), 2021-08-10
Supplement: s1 [file s1]

| Term                                        | P-Value | Adjusted P-value | Genes                                                                                                                                                                 |
|---------------------------------------------|---------|------------------|-----------------------------------------------------------------------------------------------------------------------------------------------------------------------|
| Glycolysis / Gluconeogenesis                | 6.66e-8 | 1.75e-5          | GPI; TPI1; PGAM1; ENO1; <b>ENO3</b> ; HK2; <b>LDHA</b> ; PKM; PGK1; ALDOC; ALDOA; PGM1; PFKP                                                                          |
| HIF-1 signaling pathway                     | 3.30e-5 | 3.27e-3          | <b>EGLN1</b> ; <b>LDHA</b> ; EGLN3; <b>EGLN2</b> ; TFRC; STAT3; PGK1; SLC2A1; ENO1; ALDOA; <b>ENO3</b> ; HK2                                                          |
| Fructose and mannose metabolism             | 3.73e-5 | 3.27e-3          | PFKFB4; TPI1; AKR1B1; ALDOC; ALDOA; HK2; PFKP                                                                                                                         |
| Protein processing in endoplasmic reticulum | 9.74e-5 | 6.41e-3          | ERO1A; PDIA3; HSPA5; WFS1; RRBP1; CKAP4; DDOST; PDIA4; HSP90B1; OS9; CALR; P4HB; SEC24D; <b>SEC31B</b> ; HSPA1B                                                       |
| Galactose metabolism                        | 2.32e-4 | 1.09e-2          | GALE; GAA; AKR1B1; HK2; PGM1; PFKP                                                                                                                                    |
| Lysosome                                    | 2.48e-4 | 1.09e-2          | ASAH1; LAMP1; GM2A; NPC1; GAA; SLC17A5; AP1S1; ACP5; ATP6V0A4; CTSD; CTSS; CTSB                                                                                       |
| Antigen processing and presentation         | 3.85e-4 | 1.45e-2          | PDIA3; HSPA5; RFX5; <b>HLA-C</b> ; CALR; CTSS; HSPA1B; CTSB; TAPBP                                                                                                    |
| Alanine, aspartate and glutamate metabolism | 4.64e-4 | 1.52e-2          | GPT2; ADSSL1; ASNS; ABAT; RIMKLA; RIMKLB                                                                                                                              |
| Central carbon metabolism in cancer         | 5.68e-4 | 1.66e-2          | <b>LDHA</b> ; PKM; PGAM1; IDH1; SLC2A1; SLC16A3; HK2; PFKP                                                                                                            |
| Pentose phosphate pathway                   | 1.59e-3 | 4.18e-2          | GPI; ALDOC; ALDOA; PGM1; PFKP                                                                                                                                         |
| Steroid biosynthesis                        | 1.93e-3 | 4.61e-2          | SQLE; CYP27B1; DHCR24; DHCR7                                                                                                                                          |
| Starch and sucrose metabolism               | 3.64e-3 | 7.98e-2          | GPI; GBE1; GAA; HK2; PGM1                                                                                                                                             |
| Proteoglycans in cancer                     | 6.05e-3 | 1.23e-1          | TGFB1; <b>ITGB5</b> ; FZD7; STAT3; <b>FN1</b> ; <b>WNT7A</b> ; ITPR2; <b>CDC42</b> ; WNT11; SDC1; ITGA5; EZR; <b>PPP1R12B</b>                                         |
| ECM-receptor interaction                    | 9.79e-3 | 1.84e-1          | <b>ITGB5</b> ; <b>FN1</b> ; SDC1; COL9A3; ITGB6; ITGA5; <b>THBS3</b>                                                                                                  |
| Citrate cycle (TCA cycle)                   | 1.06e-2 | 1.86e-1          | IDH1; IDH2; SUCLG2; ACO1                                                                                                                                              |
| Phagosome                                   | 1.35e-2 | 2.21e-1          | TFRC; LAMP1; <b>ITGB5</b> ; <b>HLA-C</b> ; CYBA; ATP6V0A4; CALR; ITGA5; CTSS; <b>THBS3</b>                                                                            |
| Renal cell carcinoma                        | 1.50e-2 | 2.32e-1          | <b>CDC42</b> ; EGLN1; EGLN3; TGFB1; <b>EGLN2</b> ; SLC2A1                                                                                                             |
| Human papillomavirus infection              | 1.68e-2 | 2.45e-1          | <b>ITGB5</b> ; FZD7; <b>FN1</b> ; <b>HLA-C</b> ; <b>WNT7A</b> ; <b>THBS3</b> ; <b>CDC42</b> ; SLC9A3R1; PKM; WNT11; HEY1; ATP6V0A4; COL9A3; MAML3; ITGB6; ITGA5; TLR3 |
| Thyroid hormone synthesis                   | 2.05e-2 | 2.84e-1          | PAX8; HSPA5; ITPR2; CGA; PDIA4; HSP90B1                                                                                                                               |
